# Supplementary material
Source: HighWire-hosted journal article supplement (https://jnm.snmjournals.org/highwire/filestream/95270/field_highwire_adjunct_files/0/195610_Supplemental_Data.pdf)
Supplement: 195610_Supplemental_Data.pdf [file 195610_Supplemental_Data.pdf]

Supplemental Table 1. Imaging agents in current immunotherapy trials and preclinical studies. (modified from Juergens et al, (32))

| CLINICAL AGENT                            | CANCER                                  | IMMUNOTHERAPY (IT) AND IMAGING TARGET                               | IMAGING TECHNOLOGY/<br>National Clinical Trials Number |
|-------------------------------------------|-----------------------------------------|---------------------------------------------------------------------|--------------------------------------------------------|
| <sup>18</sup> F-FDG (52, 53)              | Melanoma, renal cell, lung              | IT: anti-CTLA-4, anti-PD-1<br>Target: tumor metabolism              | PET/CT<br>NCT01666353                                  |
| <sup>18</sup> F-FDG                       | Cervical, squamous cell                 | IT: anti-CTLA-4<br>Target: tumor metabolism                         | PET/CT<br>NCT01711515                                  |
| <sup>18</sup> F-FDG                       | Multiple Cancers                        | IT: CAR-T, anti-CTLA-4, IL-2<br>Target: tumor metabolism            | PET<br>NCT02070406                                     |
| <sup>18</sup> F-FDG                       | Renal cell                              | IT: IP-2 (plus chemo)<br>Target: tumor metabolism                   | PET/CT<br>NCT01038778                                  |
| <sup>18</sup> F-FDG                       | Multiple Cancers                        | IT: CAR-T, IL-2, DC vaccine<br>Target: tumor metabolism             | PET/CT<br>PET/MRI<br>NCT01697527                       |
| <sup>18</sup> F-FDG or Na <sup>18</sup> F | Prostate                                | IT: DC vaccine with GM-CSF<br>Target: tumor metabolism              | PET/CT<br>PET/MRI<br>NCT02042053                       |
| <sup>18</sup> F-FET                       | Brain melanoma metastases               | IT: anti-PD-1, anti-CTLA-4<br>Target: tumor metabolism              | PET/MRI<br>NCT02374242                                 |
| <sup>11</sup> C-PBR28a                    | Brain                                   | IT: various IT treatments<br>Target: tumor benzodiazepine receptor  | PET<br>NCT02431572                                     |
| <sup>18</sup> F-HBG (54)                  | Glioma                                  | IT: CAR-T, IL-2<br>Target: CAR-T cells                              | PET<br>NCT01082926                                     |
| <sup>89</sup> Zr-atezolizumab(34)         | Multiple cancers                        | IT: anti-PD-L1<br>Target: PD-L1 on tumor or other cells             | PET<br>NCT02453984                                     |
| <sup>99</sup> Tc-IL-2 (55)                | Melanoma                                | IT: anti-CTLA-4, PD-1, IL-2<br>Target: TIL expressing IL-2 receptor | SPECT<br>NCT01789827                                   |
| <sup>18</sup> F-L-FAC (56)                | Healthy volunteers and multiple cancers | IT: various immunotherapies<br>Target: activated T-cells in tumor   | PET<br>NCT01180868<br>NCT01180907                      |

|                                                               |                                  |                                                                                                                                        |                                         |
|---------------------------------------------------------------|----------------------------------|----------------------------------------------------------------------------------------------------------------------------------------|-----------------------------------------|
| <sup>89</sup> Zr-GC1008 (57)                                  | Brain glioma                     | IT: anti-TGF- $\beta$<br>Target: TGF- $\beta$                                                                                          | PET<br>NCT01472731                      |
| Ferumoxytol (nanoparticles) (58)                              | Brain                            | IT: various immunotherapies<br>Target: macrophage in tumors                                                                            | MRI<br>NCT02452216                      |
| <sup>18</sup> F-F-AraG (49)                                   | Healthy subjects                 | IT: prior to various cancer IT trials<br>Target: activated T-cells                                                                     | PET<br>NCT02323893                      |
| <sup>89</sup> Zr-Pembrolizumab                                | Melanoma and Non-small cell lung | IT: pembrolizumab<br>Target: anti-PD-1                                                                                                 | PET<br>NCT02760225                      |
| fluorescent-bevacizumab-1RDye800CW (41)                       | Breast                           | Target: VEGFA                                                                                                                          | Optical imaging, fSTREAM<br>NCT01508572 |
| <b>PRECLINICAL AGENT</b>                                      |                                  | <b>TARGETING CONCEPT</b>                                                                                                               | <b>IMAGING TECHNOLOGY</b>               |
| <sup>18</sup> F or <sup>64</sup> Cu anti-CD11b or MHC II (59) |                                  | Labeled antibody fragments binding to CD11b or MHC II on tumor macrophage or myeloid cells                                             | PET                                     |
| <sup>64</sup> Cu-anti-CD8 (60)                                |                                  | Labeled antibody fragments binding to CD8 on tumor infiltrating cytotoxic T lymphocytes                                                | PET                                     |
| <sup>89</sup> Zr-anti-CD8 (44)                                |                                  | Labeled antibody fragments binding to CD8 on tumor infiltrating cytotoxic T lymphocytes                                                | PET                                     |
| <sup>18</sup> F-FEAU (61)                                     |                                  | Labeled ligand identifies viral transgene in activated CAR-T that are present in tumor                                                 | PET                                     |
| <sup>111</sup> I-anti-PD-L1 (38)                              |                                  | Labeled monoclonal antibody binds to PD-L1 expressed on macrophage and tumor cells                                                     | SPECT                                   |
| <sup>89</sup> Zr-anti-CD47 (62)                               |                                  | Labeled monoclonal antibody binds to CD47 expressed on cells within tumor                                                              | PET                                     |
| <sup>64</sup> Cu-Anti-CTLA-4 (63)                             |                                  | Labeled monoclonal antibody binds to CTLA-4 expressed on cytotoxic T lymphocytes within tumor                                          | PET                                     |
| MB-anti-B7-H3 (64)                                            |                                  | Ultrasound microbubbles labeled with monoclonal antibody against B7H3. Identifies cells expressing B7-H3 on macrophage and tumor cells | US                                      |

|                                                           |  |                                                                                                                       |                      |
|-----------------------------------------------------------|--|-----------------------------------------------------------------------------------------------------------------------|----------------------|
| <sup>64</sup> Cu-SPION (65)                               |  | CAR-T cells loaded with <sup>64</sup> Cu-CPION (iron nanoparticles). Image accumulation of therapeutic CAR-T          | PET                  |
| DiR labeled T cells (66)                                  |  | DiR fluorophore, activated by near-Infrared light, is used to label T cells. T cells that located in tumor are imaged | Fluorescence imaging |
| <sup>89</sup> Zr-bispecific T cell engaging antibody (40) |  | IT: AMG 110<br>Target: epithelial cell adhesion molecule                                                              | PET                  |

Abbreviations: CAR-T, chimeric antigen receptor T-cell; CD8, cluster of differentiation 8; CD11b, integrin alpha M; CD47, integrin-associated protein; CT, computerized tomography; CTLA-4, cytotoxic T-lymphocyte-associated protein 4; DC, dendritic cell; DiR, 1,1'-dioctabecyl-3,3,3',3'-tetramethylindotricarbocyanine iodide; <sup>18</sup>F-FDG, fluorodeoxyglucose; F-AraG, fluoro-9-β-D-arabinofuranosylguanine; FEAU, 1-(2'-deoxy-2'-fluoro-β-D-arabinofuranosyl)-5-ethyluridine; FET, fluoro-ethyl-tyrosine; GC1008, fresolimumab; GM-CSF, granulocyte-macrophage colony-stimulating factor; HBG, hydroxymethyl-butyl guanine; IL-2, interleukin-2; IT, immunotherapy; L-FAC, 1-L-(2 deoxy-2,-<sup>18</sup>Fluoroarabinofuranosyl) cytosine; MRI, magnetic resonance imaging; MB, minibody; MHC II, major histocompatibility complex 2; NCT, National Clinical Trials; PD-1, programmed cell death 1; PD-L1, programmed cell death-ligand 1; PET, positron emission tomography; PBR28, peripheral benzodiazepine receptor 28a; SPECT, single-photon emission computed tomography; SPION, super paramagnetic iron oxide nanoparticles; TGF-β, transforming growth factor-beta; TIL, tumor-infiltrating lymphocyte; US, ultrasound..

Supplemental Table 2. Molecular imaging approaches for imaging immune cells and immune responses.

|                                                   | <b>Pros</b>                                                                        | <b>Cons</b>                                                                             | <b>Current and future clinical use</b>                     |
|---------------------------------------------------|------------------------------------------------------------------------------------|-----------------------------------------------------------------------------------------|------------------------------------------------------------|
| Metabolic probes                                  | Detect metabolically active, proliferating cells                                   | Relatively non-specific                                                                 | <sup>18</sup> F-FDG<br><sup>18</sup> F-FLT and others      |
| Pre-labeled cells                                 | Low background                                                                     | Need to remove, modify, reinfuse cells<br>Dilution after cells replicate                | In-111 oxine                                               |
| Reporter genes                                    | Potentially low background<br>Can follow cells as they expand<br>Cell surface tags | Need to modify cells (in situ or ex vivo)<br>Potential immunogenicity of reporter genes | Non-immunogenic reporter genes (Nal symporter, huTk, etc.) |
| Probes for cell surface markers (antibodies, etc) | High specificity                                                                   | Endogenous antigen sink<br>Surface markers only                                         | Human/humanized probes                                     |

### Supplemental Table 3: National Institutes of Health Funding and Support

1) [General grant funding](#) includes unsolicited grants, requests for applications and specialized program announcements.

- Early Phase Clinical Trials in Imaging and IGI (R01): [PAR-14-166](#)
  - Supports early phase clinical trials
  - R01 - \$500,000 total direct costs over 2 years
- Image-guided Drug Delivery in Cancer (R01): [PAR-13-185](#)
  - Encourages innovative translational research in image-guided drug delivery (IGDD) in cancer.
- Oncology co-clinical QI imaging research resources (U24) [PAR 15-266](#)
- Academic-Industrial Partnerships for Translation of in vivo Imaging Systems for Cancer Investigations (R01): [PAR-13-169](#)
- Quantitative Imaging for Evaluation of Responses to Cancer Therapies: [PAR 14-116](#)
- NCI Informatics (U01, R01, P01, U24): [PAR 12-286-290](#)

2) Funding U.S. based small businesses

The Small Business Innovation Research (SBIR) [PA-14-071](#)

Small Business Technology Transfer (STTR) [PA-14-072](#)

3) NCI Experimental Therapeutics ([NExT](#)) program (67)

Provides direct access to NCI resources and expertise, but it is not a grant. NCI performs approved portions of the project for the applicant using its internal resources.

Resources that NCI can provide are:

- Multi- and interdisciplinary clinical/translational teams
- Early access to leading-edge translational technologies
- PK/PD modeling and assay development
- Toxicology/Safety Pharmacology
- Formulation & GMP Scale-Up
- Imaging for biodistribution
- Development & validation of pharmacodynamics assays
- Development & validation of clinical assays
- Proof-of-concept or first in human studies
- <https://next.cancer.gov/experimentalTherapeutics/form.htm>

## ABBREVIATIONS

|                     |                                                 |
|---------------------|-------------------------------------------------|
| CT                  | computed tomography                             |
| CAR-T               | chimeric antigen receptor T cells               |
| <sup>18</sup> F-FDG | fluorodeoxyglucose                              |
| FLT                 | fluorothymidine                                 |
| HER2                | human epidermal growth factor receptor 2        |
| IDO                 | indoleamine 2,3 dioxygenase                     |
| MATCH               | Molecular Analysis for Therapeutic Choice Trial |
| MRI                 | magnetic resonance imaging                      |
| NCI                 | National Cancer Institute                       |
| NEXT                | NCI Experimental Therapeutics Program           |
| NIH                 | National Institutes of Health                   |
| PET                 | positron emission tomography                    |
| RECIST              | response evaluation criteria in solid tumors    |
| TME                 | tumor microenvironment                          |

## REFERENCES FOR Supplemental Table 1 and 3

- 32.** Juergens RA, Zukotynski KA, Singnurkar A, Snider DP, Valliant JF, Gulenchyn KY. Imaging biomarkers in immunotherapy. *Biomark Cancer*. 2016;8(Suppl 2):1-13.
- 34.** Lamberts LE, Williams SP, Terwisscha van Scheltinga AG, et al. Antibody positron emission tomography imaging in anticancer drug development. *J Clin Oncol*. May 01 2015;33(13):1491-1504.
- 35.** Jauw YW, Menke-van der Houven van Oordt CW, Hoekstra OS, et al. Immuno-Positron Emission Tomography with Zirconium-89-Labeled Monoclonal Antibodies in Oncology: What Can We Learn from Initial Clinical Trials? *Front Pharmacol*. 2016;7:131.
- 38.** Heskamp S, Hobo W, Molkenboer-Kuenen JD, et al. Noninvasive imaging of tumor PD-L1 expression using radiolabeled anti-PD-L1 antibodies. *Cancer Res*. Jul 15 2015;75(14):2928-2936.
- 40.** Warnders FJ, Waaijer SJ, Pool M, et al. Biodistribution and PET imaging of labeled bispecific T cell-engaging antibody targeting EpCAM. *J Nucl Med*. May 2016;57(5):812-817.
- 41.** Koch M, de Jong JS, Glatz J, et al. Threshold analysis and biodistribution of fluorescently labeled bevacizumab in human breast cancer. *Cancer Res*. Feb 01 2017;77(3):623-631.
- 42.** McCracken MN, Tavare R, Witte ON, Wu AM. Advances in PET detection of the antitumor T cell response. *Adv Immunol*. 2016;131:187-231.
- 44.** Tavare R, McCracken MN, Zettlitz KA, et al. Immuno-PET of Murine T Cell reconstitution postadoptive stem cell transplantation using anti-CD4 and anti-CD8 cys-diabodies. *J Nucl Med*. Aug 2015;56(8):1258-1264.
- 45.** Tavare R, Escuin-Ordinas H, Mok S, et al. An effective immuno-PET imaging method to monitor CD8-dependent responses to immunotherapy. *Cancer Res*. Jan 1 2016;76(1):73-82.

49. Namavari M, Chang YF, Kusler B, Yaghoubi S, Mitchell BS, Gambhir SS. Synthesis of 2'-deoxy-2'-[18F]fluoro-9-beta-D-arabinofuranosylguanine: a novel agent for imaging T-cell activation with PET. *Mol Imaging Biol.* Oct 2011;13(5):812-818.
50. Chatterjee S, Lesniak WG, Miller MS, et al. Rapid PD-L1 detection in tumors with PET using a highly specific peptide. *Biochem Biophys Res Commun.* Jan 29 2017;483(1):258-263.
52. Schoder H, Yeung HW. Positron emission imaging of head and neck cancer, including thyroid carcinoma. *Semin Nucl Med.* Jul 2004;34(3):180-197.
53. Specht JM, Tam SL, Kurland BF, et al. Serial 2-[18F] fluoro-2-deoxy-D-glucose positron emission tomography (FDG-PET) to monitor treatment of bone-dominant metastatic breast cancer predicts time to progression (TTP). *Breast Cancer Res Treat.* Sep 2007;105(1):87-94.
54. Yaghoubi SS, Jensen MC, Satyamurthy N, et al. Noninvasive detection of therapeutic cytolytic T cells with 18F-FHBG PET in a patient with glioma. *Nat Clin Pract Oncol.* Jan 2009;6(1):53-58.
55. Glaudemans AW, Bonanno E, Galli F, et al. In vivo and in vitro evidence that (9)(9)mTc-HYNIC-interleukin-2 is able to detect T lymphocytes in vulnerable atherosclerotic plaques of the carotid artery. *Eur J Nucl Med Mol Imaging.* Sep 2014;41(9):1710-1719.
56. Radu CG, Shu CJ, Nair-Gill E, et al. Molecular imaging of lymphoid organs and immune activation by positron emission tomography with a new [18F]-labeled 2'-deoxycytidine analog. *Nat Med.* Jul 2008;14(7):783-788.
57. den Hollander MW, Bensch F, Glaudemans AW, et al. TGF-beta antibody uptake in recurrent high-grade glioma imaged with 89Zr-fresolimumab PET. *J Nucl Med.* Sep 2015;56(9):1310-1314.
58. Iv M, Telischak N, Feng D, Holdsworth SJ, Yeom KW, Daldrup-Link HE. Clinical applications of iron oxide nanoparticles for magnetic resonance imaging of brain tumors. *Nanomedicine (Lond).* 2015;10(6):993-1018.



- 59.** Rashidian M, Keliher EJ, Bilate AM, et al. Noninvasive imaging of immune responses. *Proc Natl Acad Sci U S A*. May 12 2015;112(19):6146-6151.
- 60.** Tavare R, McCracken MN, Zettlitz KA, et al. Engineered antibody fragments for immuno-PET imaging of endogenous CD8+ T cells in vivo. *Proc Natl Acad Sci U S A*. Jan 21 2014;111(3):1108-1113.
- 61.** Dotti G, Tian M, Savoldo B, et al. Repetitive noninvasive monitoring of HSV1-tk-expressing T cells intravenously infused into nonhuman primates using positron emission tomography and computed tomography with 18F-FEAU. *Mol Imaging*. Jul-Aug 2009;8(4):230-237.
- 62.** Zheleznyak A, Ikotun OF, Dimitry J, Frazier WA, Lapi SE. Imaging of CD47 expression in xenograft and allograft tumor models. *Mol Imaging*. Nov-Dec 2013;12(8).
- 63.** Higashikawa K, Yagi K, Watanabe K, et al. 64Cu-DOTA-anti-CTLA-4 mAb enabled PET visualization of CTLA-4 on the T-cell infiltrating tumor tissues. *PLoS One*. 2014;9(11):e109866.
- 64.** Bachawal SV, Jensen KC, Wilson KE, Tian L, Lutz AM, Willmann JK. Breast cancer detection by B7-H3-targeted ultrasound molecular imaging. *Cancer Res*. Jun 15 2015;75(12):2501-2509.
- 65.** Bhatnagar P, Alauddin M, Bankson JA, et al. Tumor lysing genetically engineered T cells loaded with multi-modal imaging agents. *Sci Rep*. Mar 28 2014;4:4502.
- 66.** Youniss FM, Sundaresan G, Graham LJ, et al. Near-infrared imaging of adoptive immune cell therapy in breast cancer model using cell membrane labeling. *PLoS One*. 2014;9(10):e109162.
- 67.** [Internet] NIH National Cancer Institute DCTD Division of Cancer Treatment and Diagnosis: Consultation on development of small molecules, biologics, and imaging products intended for cancer patients. Accessed April 27, 2017, available at <https://nextcancergov/experimentalTherapeutics/formhtm>. February 2, 2017.
